# Supplementary material for: Assessment of Packaged Foods and Beverages Carrying Nutrition Marketing against Canada’s Food Guide Recommendations
Source: PubMed Central journal article supplement (PMC6412409; doi:10.3390/nu11020411), 2019-02-15
Supplement: nutrients-11-00411-s001.pdf [file nutrients-11-00411-s001.pdf]

**Supplementary Table 1. Examples of health-related claims under the INFORMAS taxonomy<sup>1</sup>**

| Types of health-related claims           |                                         | Examples                  |                                                                                              |
|------------------------------------------|-----------------------------------------|---------------------------|----------------------------------------------------------------------------------------------|
| <b>Nutrition Claim</b>                   |                                         |                           |                                                                                              |
| <i>Nutrient content claim</i>            | Fibre                                   | Sodium/Salt               | "Source of protein"                                                                          |
|                                          | Energy                                  | Cholesterol               |                                                                                              |
|                                          | Antioxidants/vitamins/minerals/hormones | Omega 3                   |                                                                                              |
|                                          | Carbohydrates                           | Taurine/guanine           |                                                                                              |
|                                          | Fats                                    | Caffeine                  |                                                                                              |
|                                          | Sugar                                   | Protein                   |                                                                                              |
| <i>Nutrient comparative claim</i>        | Reduced fat                             | Reduced calories          | "Reduced in sodium"                                                                          |
|                                          | More calcium                            | More fibre                |                                                                                              |
|                                          | Less sodium/salt                        | Reduced carbohydrates     |                                                                                              |
|                                          | Reduced sugar                           | More protein              |                                                                                              |
| <i>Health-related ingredient Claim</i>   | Wholegrain                              | Grains/seeds              | "Contains wholegrain"                                                                        |
|                                          | Fruits/nuts/honey                       | Milk/cream                |                                                                                              |
|                                          | Vegetables/plants                       | Edible oils/oil emulsions |                                                                                              |
|                                          | Bacteria/culture/probiotics/prebiotics  | Cocoa/cacao               |                                                                                              |
| <b>Health Claims</b>                     |                                         |                           |                                                                                              |
| <i>General health claim</i>              | General health claim                    | Specific body systems     | "Healthy", "Maintaining healthy body weight"                                                 |
|                                          | Super, healthy,                         | Digestive health          |                                                                                              |
|                                          | Low GI/energy density                   | Bones health              |                                                                                              |
| <i>Nutrient and other function claim</i> | Nutrient + nutrient absorption          | Nutrient + muscle         | "Probiotic cereal that contributes to healthy gut flora"                                     |
|                                          | Nutrient + bone                         | Nutrient + digestion      |                                                                                              |
|                                          | Nutrient + growth                       | Nutrient + immunity       |                                                                                              |
|                                          | Nutrient + energy                       | Nutrient + overall health |                                                                                              |
|                                          | Nutrient + strength                     | Nutrient + brain          |                                                                                              |
| <i>Reduction of disease risk Claim</i>   | Heart-related                           | Diabetes                  | "A healthy diet low in saturated and <i>trans</i> fats may reduce the risk of heart disease" |
|                                          | Heart Foundation logos <sup>2</sup>     | Glycaemic impact          |                                                                                              |
|                                          | Nutrient absorption                     | Osteoporosis              |                                                                                              |
|                                          | Cholesterol absorption                  |                           |                                                                                              |
| <b>Other Claims</b>                      |                                         |                           |                                                                                              |
| <i>Other health-related claims</i>       | Other health-related claim              |                           | "Gluten-free"                                                                                |
|                                          | Environment claim                       |                           | "Organic"                                                                                    |

<sup>1</sup>Adapted from Rayner, et al, *Monitoring the health-related labelling of foods and non-alcoholic beverages in retail settings. Obes Rev, 2013. 14 Suppl 1: p. 70-81.* "A taxonomy of health-related food labelling for INFORMAS"; Rayner, M. and S. Vandevijvere. *INFORMAS Protocol: Food Labelling Module*. 2017. Available from: [https://figshare.com/articles/INFORMAS\\_Protocol\\_Food\\_Labelling\\_Module/5673643](https://figshare.com/articles/INFORMAS_Protocol_Food_Labelling_Module/5673643) <sup>2</sup> Logos used by national heart foundations such as the British

Heart Foundation or the Australia/New Zealand Heart Foundation Tick were considered as reduction of disease risk claims. In Canada, a similar symbol was used at the time of data collection (the Heart and Stroke Foundation logo) and therefore classified as such for the propose of this study; however, it is important to note that the claim did not comply with the Canadian regulations for disease risk reduction claims and it could be considered instead as an unregulated general health claim. The Heart and Stroke Foundation logo was discontinued in 2014.

**Supplementary Table 2. Global Food Monitoring Group food categories<sup>1</sup>**

|                                                                                                    | <b>Food category</b>                                                               | <b>Description</b>                                                                                      |                                                                                                   |
|----------------------------------------------------------------------------------------------------|------------------------------------------------------------------------------------|---------------------------------------------------------------------------------------------------------|---------------------------------------------------------------------------------------------------|
| <b>Beverages</b>                                                                                   | Juices                                                                             | Fresh and ambient fruit and vegetable juices                                                            |                                                                                                   |
|                                                                                                    | Soft drinks                                                                        | Sugar-sweetened and artificially-sweetened soft drinks                                                  |                                                                                                   |
|                                                                                                    | Electrolyte drinks                                                                 | Sports electrolyte drinks                                                                               |                                                                                                   |
|                                                                                                    | Waters                                                                             | Plain and flavored waters                                                                               |                                                                                                   |
|                                                                                                    | Coffee and tea                                                                     | All coffee and tea products                                                                             |                                                                                                   |
|                                                                                                    | Powdered beverages                                                                 | All beverage mixes                                                                                      |                                                                                                   |
| <b>Bread and bakery products</b>                                                                   | Bread                                                                              | White, wholemeal and mixed grain/seed sliced bread and rolls                                            |                                                                                                   |
|                                                                                                    |                                                                                    | Fruit bread and fruit-based muffins/rolls                                                               |                                                                                                   |
|                                                                                                    |                                                                                    | Wraps and other flatbread products                                                                      |                                                                                                   |
|                                                                                                    |                                                                                    | Turkish pide, bagels, English-style muffins, crumpets, pizza bases and other plain bread-based products |                                                                                                   |
|                                                                                                    | Biscuits and cookies                                                               | Filled and unfilled sweet biscuits                                                                      |                                                                                                   |
|                                                                                                    | Cakes, muffins and pastry                                                          | Flavored and plain crisp bread and crackers                                                             |                                                                                                   |
| Scones, pikelets, doughnuts, cakes, sweet buns, pancakes, crepes, muffins (cake-style), slices etc |                                                                                    |                                                                                                         |                                                                                                   |
| Cake, pikelet and pancake dry mixes                                                                |                                                                                    |                                                                                                         |                                                                                                   |
|                                                                                                    |                                                                                    | Sweet pastries (fresh, ambient, chilled and frozen)                                                     |                                                                                                   |
| <b>Cereal and grain products</b>                                                                   | Breakfast cereal                                                                   | Ready to eat breakfast cereals                                                                          |                                                                                                   |
|                                                                                                    |                                                                                    | Oats and other breakfast cereals that require heating                                                   |                                                                                                   |
|                                                                                                    |                                                                                    | Other processed cereals (e.g. bran)                                                                     |                                                                                                   |
|                                                                                                    | Cereal and nut-based bars                                                          | Plain, chocolate-topped and yoghurt-topped cereal-based bars                                            |                                                                                                   |
|                                                                                                    | Noodles                                                                            | Plain dry noodles                                                                                       |                                                                                                   |
|                                                                                                    |                                                                                    | Savory/flavored dry noodle-based dishes                                                                 |                                                                                                   |
|                                                                                                    |                                                                                    | Pasta                                                                                                   | Canned and ambient pasta and sauce (with and without meat) products (excludes frozen ready meals) |
|                                                                                                    |                                                                                    |                                                                                                         | Packaged fresh pasta with sauce                                                                   |
|                                                                                                    | Savory/flavored dry pasta-based side dishes                                        |                                                                                                         |                                                                                                   |
|                                                                                                    |                                                                                    |                                                                                                         | Plain dry pasta                                                                                   |
| Rice                                                                                               | Plain rice                                                                         |                                                                                                         |                                                                                                   |
|                                                                                                    | Savory rice-based side dishes                                                      |                                                                                                         |                                                                                                   |
| Other breakfast products                                                                           | All breakfast products not included in “Breakfast cereal”                          |                                                                                                         |                                                                                                   |
| Other cereal products                                                                              | Flour and other unprocessed cereals (e.g. polenta, cous cous, bread crumbs, yeast) |                                                                                                         |                                                                                                   |
| <b>Confectionery</b>                                                                               | Chocolate and sweets                                                               | Chocolate-based confectionery, sugar-based confectionery                                                |                                                                                                   |
|                                                                                                    | Chewing gum                                                                        | All sugar-sweetened and sugar-free chewing gums and bubble gum products                                 |                                                                                                   |

|                                            |                                    |                                                                                                                                                                                                                                                                                 |
|--------------------------------------------|------------------------------------|---------------------------------------------------------------------------------------------------------------------------------------------------------------------------------------------------------------------------------------------------------------------------------|
| <b>Convenience foods</b>                   | Pizza                              | Frozen and refrigerated pre-packed pizzas                                                                                                                                                                                                                                       |
|                                            | Soup                               | Canned, chilled and ambient soup products                                                                                                                                                                                                                                       |
|                                            | Ready meals                        | Frozen, chilled and ambient pre-prepared meals                                                                                                                                                                                                                                  |
|                                            | Meal kits                          | Kits with ingredients to put meals together                                                                                                                                                                                                                                     |
|                                            | Pre-prepared salads and sandwiches | Chilled pre-prepared salads and sandwiches                                                                                                                                                                                                                                      |
|                                            | Other convenience foods            | Other pre-prepared foods not included in above categories                                                                                                                                                                                                                       |
| <b>Dairy</b>                               | Cheese                             | Feta, haloumi, parmesan and other high-salt cheeses<br>All types of full and reduced fat cheddar/Colby etc cheese including shredded, block or sliced<br>Soft cheeses such as cream cheese, ricotta and cottage cheese<br>Processed cheese slices and products                  |
|                                            | Cream                              | Thickened, sour and regular cream products                                                                                                                                                                                                                                      |
|                                            | Desserts                           | Dairy-based desserts (e.g. custards, rice puddings)<br>Dairy-based dessert mixes (e.g. powders)                                                                                                                                                                                 |
|                                            | Ice cream and edible ices          | Dairy and non-dairy-based ice cream varieties and edible ices                                                                                                                                                                                                                   |
|                                            | Milk products                      | Flavored and unflavored dairy milk products<br>Flavored and unflavored soymilks<br>Flavored and unflavored oat, almond and other milks<br>Condensed, evaporated and powdered milk products (including coconut milk)                                                             |
|                                            | Yoghurt products                   | Fruit, flavored and natural yoghurts (full fat, reduced fat and skim varieties) including yoghurt drinks                                                                                                                                                                        |
| <b>Edible oils</b>                         |                                    | Salted and unsalted butter and margarine products                                                                                                                                                                                                                               |
| <b>Fruit, vegetables, nuts and legumes</b> | Fruit                              | Dried fruit products including coconut<br>Fruit-based bars<br>Fruit products canned in juice or syrup<br>Fruit gels, fruits in jelly and fruit puree                                                                                                                            |
|                                            | Jam and fruit spreads              | Jams, marmalades and other preserves                                                                                                                                                                                                                                            |
|                                            | Nuts and seeds                     | Salted and unsalted nuts and seeds                                                                                                                                                                                                                                              |
|                                            | Vegetables                         | Canned tomato products<br>Canned beans and peas<br>Baked beans in tomato sauce (with and without additions)<br>Canned creamed, plain and sweet corn<br>All other canned vegetables<br>Pickled vegetable and olive products<br>Frozen potato-based products<br>Frozen vegetables |

|                                         |                                |                                                                                                                                                                                                                                                                                                                                                                                                                                                          |
|-----------------------------------------|--------------------------------|----------------------------------------------------------------------------------------------------------------------------------------------------------------------------------------------------------------------------------------------------------------------------------------------------------------------------------------------------------------------------------------------------------------------------------------------------------|
| <b>Meat and meat alternatives</b>       | Meat alternatives              | Plain tofu and other meat-free alternatives<br>Meat-free products (e.g. meat-free sausages)                                                                                                                                                                                                                                                                                                                                                              |
|                                         | Processed meat                 | Pre-packed bacon products<br>Beef, pork, chicken and lamb sausages and chilled hot dogs<br>Pre-packaged sliced deli meats<br>Pre-packaged salami and cured meats<br>Beef, pork, chicken and lamb meat burgers<br>Canned meat products (excluding soup and pasta)<br>Frozen meat pies, sausage rolls and other meat-based pastry products                                                                                                                 |
| <b>Sauces, dressings and condiments</b> | Mayonnaise and salad dressings | Full and low-fat mayonnaise<br>Oil-based, vinegar-based and other types of salad dressing                                                                                                                                                                                                                                                                                                                                                                |
|                                         | Sauces                         | Table sauces such as tomato sauces and ketchups, sweet chilli, BBQ sauces<br>Steak, HP and Worcestershire sauces<br>Soy, fish, oyster and other Asian high-salt sauces<br>Mustard products<br>Marinade products<br>Meat accompaniments (e.g. apple, cranberry and mint sauces)<br>Plain and flavored tomato paste products<br>Asian and Indian flavored powdered, ambient and liquid meal-based sauces<br>Ambient and fresh pasta sauces<br>Recipe bases |
|                                         | Spreads                        | Liquid and powdered gravies and stock<br>Crunchy and smooth salted and unsalted peanut butter<br>Relishes, chutneys and pickles<br>Other savory spreads (e.g. vegetable spreads)<br>Pâté spreads<br>Sweet spreads<br>Yeast-extract spreads (e.g. vegemite)<br>Chilled and ambient dips and salsa                                                                                                                                                         |
| <b>Eggs</b>                             |                                | All egg products                                                                                                                                                                                                                                                                                                                                                                                                                                         |
| <b>Fish and fish products</b>           | Canned seafood                 | All varieties of plain and flavored canned seafood                                                                                                                                                                                                                                                                                                                                                                                                       |
|                                         | Chilled and frozen seafood     | Chilled processed fish products (e.g. smoked salmon)<br>Coated frozen fish products (e.g. fish fingers) and uncoated fish products                                                                                                                                                                                                                                                                                                                       |

|                                          |                                                                                                                                                                                                                                                                                     |
|------------------------------------------|-------------------------------------------------------------------------------------------------------------------------------------------------------------------------------------------------------------------------------------------------------------------------------------|
| <b>Snack foods</b>                       | Plain and flavored potato crisps<br>Plain and flavored snack foods<br>Extruded snacks (e.g. cheesy snacks)<br>Plain and flavored corn chips<br>Pretzels, popcorn and other snackfoods<br>Other fried snackfoods (e.g. plantain chips)<br>All varieties of cracker-based snack packs |
| <b>Sugar, honey and related products</b> | Honey and syrups<br>Honey, golden, maple and other syrups<br>Dessert toppings<br>Sugar and artificial sweeteners                                                                                                                                                                    |

<sup>1</sup> Adapted from Dunford, E., *et al.* International collaborative project to compare and monitor the nutritional composition of processed foods. *Eur J Prev Cardiol* 19, 1326-1332 (2012); Rayner, M. and S. Vandevijvere. *INFORMAS Protocol: Food Labelling Module*. 2017. Available from: [https://figshare.com/articles/INFORMAS\\_Protocol\\_Food\\_Labelling\\_Module/5673643](https://figshare.com/articles/INFORMAS_Protocol_Food_Labelling_Module/5673643)
